# Supplementary material for: Trends in orthopaedic surgery for spondyloarthritis: outcomes from a National Hospitalised Patient Registry (MBDS) over a 17-year period (1999–2015).TREND-EspA study
Source: HighWire-hosted journal article supplement (doi:10.1136/rmdopen-2021-002107), 2022-03-01
Supplement: rmdopen-2021-002107supp001_data_supplement.pdf [file rmdopen-2021-002107supp001_data_supplement.pdf]

## SUPPLEMENTARY MATERIAL

SM-Table 1: Clinical Characteristics of the Spa and Non-Spa Cohorts

|                             | SpA Cohort                    | Non-SpA Cohort                 |                |
|-----------------------------|-------------------------------|--------------------------------|----------------|
|                             | N admissions (%)              | 107,140 (100)                  | 107,140(100)   |
|                             | Male %                        | 66.63                          | 66.63          |
|                             | Age mean (SD)                 | 58.94 SD (15,58)               | 58.94 (15.58)  |
|                             | ALOS mean (SD)                | 10.59 SD (15.37) <sup>§*</sup> | 7.89 (11.5)    |
|                             | Deceased (%)                  | 3,619 (3,37) <sup>*</sup>      | 4,388 (4.09)   |
| Charlson and its components | Charlson index mean (SD)      | 1.14 SD (1,81) <sup>§*</sup>   | 1.36 (2.12)    |
|                             | Severe liver disease (%)      | 1,479 (1.38) <sup>*</sup>      | 1,928 (1.79)   |
|                             | Kidney disease (%)            | 8,347 (7.79) <sup>§*</sup>     | 5,708 (5.32)   |
|                             | COPD (%)                      | 1,4467 (13.5) <sup>*</sup>     | 13,745 (12.82) |
|                             | Connective tissue disease (%) | 2,561 (2.39) <sup>§*</sup>     | 1,118 (1.04)   |
|                             | Pressure_ulcer (%)            | 1,577 (1.47) <sup>*</sup>      | 1,872 (1.74)   |
|                             | Dementia (%)                  | 629 (0.58) <sup>*</sup>        | 845 (0.78)     |
|                             | Metastases (%)                | 3,199 (2.98) <sup>§*</sup>     | 5,804 (5.41)   |
|                             | AIDS (%)                      | 771 (0.71) <sup>*</sup>        | 872 (0.81)     |
|                             | DM (%)                        | 14,856 (13.86)                 | 14,677 (13.69) |
|                             | Tumor (%)                     | 8,209 (7.66) <sup>§*</sup>     | 13,817 (12.89) |
|                             | Leukemia (%)                  | 623 (0.58)                     | 626 (0.58)     |
| Lymphoma (%)                | 1,257 (1.17) <sup>*</sup>     | 1,412 (1.31)                   |                |
| CV Disease                  | CV disease (%)                | 55,475 (51.77) <sup>*</sup>    | 51,062 (47.65) |
|                             | Ischemic heart disease (%)    | 11,718 (10.93) <sup>*</sup>    | 12,246 (11.42) |
|                             | Heart failure (%)             | 6,216 (5.80) <sup>*</sup>      | 5,913 (5.51)   |
|                             | Cerebrovascular disease (%)   | 4,730 (4.41) <sup>*</sup>      | 5,822 (5.43)   |
|                             | Aortic aneurysm (%)           | 655 (0.61)                     | 710 (0.66)     |
|                             | Valvular disease (%)          | 3,545 (3.30) <sup>*</sup>      | 3,047 (2.84)   |
|                             | DVT_PE (%)                    | 655 (0.61)                     | 606 (0.56)     |
| Others                      | HTN (%)                       | 31,580 (29.48) <sup>*</sup>    | 28,405 (26.51) |
|                             | Tobacco use (%)               | 13,339 (12.45)                 | 13,446 (12.54) |
|                             | Hyperlipidemia (%)            | 17,847 (16.66) <sup>*</sup>    | 17,236 (16.08) |
|                             | Sarcoidosis (%)               | 133 (0.12) <sup>*</sup>        | 87 (0.08)      |
|                             | c_equina (%)                  | 149 (0.13) <sup>*</sup>        | 45 (0.04)      |
|                             | Uveitis (%)                   | 554 (0.51) <sup>*</sup>        | 33 (0.03)      |
|                             | Depression (%)                | 5,962 (5.56) <sup>*</sup>      | 4,168 (3.89)   |
| Infectious Disease          | ID (%)                        | 19,151 (17.87) <sup>§*</sup>   | 10323 (9.63)   |
|                             | Bacterial meningitis ID (%)   | 133 (0.12) <sup>*</sup>        | 63 (0.05)      |
|                             | Heart ID (%)                  | 453 (0.42) <sup>*</sup>        | 62 (0.05)      |
|                             | Respiratory ID (%)            | 6,525 (6.09) <sup>*</sup>      | 5,646 (5.26)   |
|                             | Kidney ID (%)                 | 4,680 (4.36) <sup>*</sup>      | 3,643 (3.4)    |
|                             | Skin ID (%)                   | 1,726 (1.61) <sup>*</sup>      | 1,117 (1.04)   |

|                               |                               |                           |              |
|-------------------------------|-------------------------------|---------------------------|--------------|
| <b>Infectious<br/>Disease</b> | <b>Pyogenic arthritis (%)</b> | 411 (0.38)*               | 76 (0.07)    |
|                               | <b>Osteomyelitis (%)</b>      | 446 (0.41)*               | 119 (0.11)   |
|                               | <b>Prosthesis ID (%)</b>      | 446 (0.41)*               | 173 (0.16)   |
|                               | <b>Post-surgical ID (%)</b>   | 1,244 (1.16)              | 1,186 (1.10) |
|                               | <b>TB (%)</b>                 | 630 (0.61) <sup>§</sup> * | 295 (0.27)   |
|                               | <b>Pulmonary TB (%)</b>       | 202 (0.19)*               | 139 (0.13)   |
|                               | <b>CNS TB (%)</b>             | 17 (0.01)*                | 6 (0.005)    |
|                               | <b>GI TB (%)</b>              | 13 (0.01)*                | 0 (0)        |
|                               | <b>Osteoarticular TB (%)</b>  | 33 (0.03)*                | 5 (0.004)    |
|                               | <b>Spinal TB (%)</b>          | 22 (0.021)*               | 4 (0.003)    |
|                               | <b>Urogenital TB (%)</b>      | 7 (0.006)                 | 6 (0.005)    |
|                               | <b>Miliary TB_ (%)</b>        | 77 (0.07)*                | 10 (0.009)   |
|                               | <b>Cytomegalovirus (%)</b>    | 109 (0.10)*               | 77 (0.07)    |
|                               | <b>EpsteinBarr_virus (%)</b>  | 39 (0.03)*                | 19 (0.01)    |
|                               | <b>Herpes_zoster (%)</b>      | 258 (0.24)*               | 154 (0.14)   |
|                               | <b>HCV (%)</b>                | 1,418 (1.32)*             | 1,644 (1.53) |
|                               | <b>HBV (%)</b>                | 343 (0.32)*               | 275 (0.25)   |

<sup>§</sup> standardized mean difference (SMD) >0.1. \*p<0.05. Abbreviations: OR: odds ratio ; ALOS: Average Length Of Stay; SD: standard deviation; TB: tuberculosis; COPD: chronic obstructive pulmonary disease; AIDS: acquired immunodeficiency syndrome; DM: diabetes mellitus; CV: cardiovascular, DVT-PE: deep vein thrombosis-pulmonary embolism; HT: hypertension; c\_equina: cauda equina; ID: infectious disease; CNS: central nervous system; GI: gastrointestinal; HCV: hepatitis C virus; HBV: hepatitis B virus.

SM-Table 2: Crude and Adjusted Incidence by Type of OS for Men.

| Men    | Year             | Population*      | SpA Cohort   |                             |                                  |               | Non-SpA Cohort |                             |                                  |              |              |              |
|--------|------------------|------------------|--------------|-----------------------------|----------------------------------|---------------|----------------|-----------------------------|----------------------------------|--------------|--------------|--------------|
|        |                  |                  | Cases        | Crude rate (/100,000 /year) | Adjusted rate** (/100,000 /year) | 95% CI        | Cases          | Crude rate (/100,000 /year) | Adjusted rate** (/100,000 /year) | 95% CI       |              |              |
| All OS | 1999             | 172,698          | 110          | 63.69                       | 69.26                            | 56.69         | 84.21          | 27                          | 15.63                            | 16.98        | 11.13        | 25.32        |
|        | 2000             | 174,765          | 143          | 81.82                       | 89.24                            | 75.02         | 105.77         | 49                          | 28.04                            | 30.07        | 22.21        | 40.34        |
|        | 2001             | 176,763          | 146          | 82.60                       | 90.43                            | 76.20         | 106.91         | 64                          | 36.21                            | 40.30        | 30.95        | 52.00        |
|        | 2002             | 180,809          | 166          | 91.81                       | 101.00                           | 86.00         | 118.15         | 64                          | 35.40                            | 39.10        | 30.02        | 50.42        |
|        | 2003             | 185,045          | 177          | 95.65                       | 103.57                           | 88.76         | 120.48         | 80                          | 43.23                            | 48.04        | 37.99        | 60.25        |
|        | 2004             | 188,735          | 178          | 94.31                       | 103.99                           | 89.19         | 120.83         | 82                          | 43.45                            | 47.63        | 37.81        | 59.50        |
|        | 2005             | 193,29           | 168          | 86.92                       | 93.93                            | 80.13         | 109.64         | 87                          | 45.01                            | 49.77        | 39.80        | 61.73        |
|        | 2006             | 196,662          | 201          | 102.21                      | 111.11                           | 96.18         | 127.91         | 105                         | 53.39                            | 58.10        | 47.46        | 70.64        |
|        | 2007             | 200,927          | 209          | 104.02                      | 114.82                           | 99.73         | 131.73         | 100                         | 49.77                            | 54.22        | 44.08        | 66.18        |
|        | 2008             | 204,415          | 193          | 94.42                       | 103.34                           | 89.21         | 119.20         | 104                         | 50.88                            | 55.65        | 45.44        | 67.66        |
|        | 2009             | 205,834          | 186          | 90.36                       | 98.43                            | 84.74         | 113.81         | 102                         | 49.55                            | 54.69        | 44.58        | 66.54        |
|        | 2010             | 206,414          | 211          | 102.22                      | 108.90                           | 94.66         | 124.77         | 134                         | 64.92                            | 70.25        | 58.84        | 83.32        |
|        | 2011             | 206,88           | 219          | 105.86                      | 112.23                           | 97.83         | 128.20         | 144                         | 69.61                            | 73.90        | 62.31        | 87.07        |
|        | 2012             | 206,612          | 212          | 102.61                      | 107.49                           | 93.51         | 123.05         | 148                         | 71.63                            | 74.56        | 63.00        | 87.67        |
|        | 2013             | 205,474          | 261          | 127.02                      | 130.76                           | 115.36        | 147.64         | 200                         | 97.34                            | 100.31       | 86.89        | 115.23       |
|        | 2014             | 204,569          | 296          | 144.69                      | 146.60                           | 130.39        | 164.28         | 183                         | 89.46                            | 90.75        | 78.06        | 104.91       |
|        | 2015             | 204,119          | 355          | 173.92                      | 173.92                           | 156.29        | 192.98         | 191                         | 93.57                            | 93.57        | 80.78        | 107.80       |
|        | <b>1999-2015</b> | <b>3,314,018</b> | <b>3,431</b> | <b>103.53</b>               | <b>111.16</b>                    | <b>107.46</b> | <b>114.94</b>  | <b>1,864</b>                | <b>56.25</b>                     | <b>60.67</b> | <b>57.95</b> | <b>63.48</b> |
| THA    | 1999             | 172,698          | 68           | 39.38                       | 43.25                            | 33.45         | 55.52          | 14                          | 8.11                             | 8.81         | 4.81         | 15.48        |
|        | 2000             | 174,765          | 93           | 53.21                       | 59.35                            | 47.82         | 73.30          | 23                          | 13.16                            | 14.14        | 8.96         | 21.81        |
|        | 2001             | 176,763          | 87           | 49.22                       | 54.57                            | 43.59         | 67.88          | 30                          | 16.97                            | 18.93        | 12.69        | 27.61        |
|        | 2002             | 180,809          | 108          | 59.73                       | 65.97                            | 53.94         | 80.23          | 32                          | 17.70                            | 20.38        | 13.88        | 29.25        |
|        | 2003             | 185,045          | 107          | 57.82                       | 61.82                            | 50.52         | 75.22          | 40                          | 21.62                            | 24.42        | 17.41        | 33.68        |
|        | 2004             | 188,735          | 106          | 56.16                       | 60.83                            | 49.70         | 73.99          | 35                          | 18.54                            | 20.94        | 14.56        | 29.46        |
|        | 2005             | 193,29           | 98           | 50.70                       | 55.13                            | 44.67         | 67.57          | 35                          | 18.11                            | 20.20        | 14.05        | 28.39        |
|        | 2006             | 196,662          | 109          | 55.42                       | 59.77                            | 48.98         | 72.46          | 40                          | 20.34                            | 22.54        | 16.02        | 31.02        |
|        | 2007             | 200,927          | 119          | 59.23                       | 65.54                            | 54.28         | 78.64          | 34                          | 16.92                            | 18.60        | 12.85        | 26.22        |
|        | 2008             | 204,415          | 84           | 41.09                       | 44.52                            | 35.45         | 55.35          | 33                          | 16.14                            | 18.36        | 12.61        | 25.98        |
|        | 2009             | 205,834          | 82           | 39.84                       | 43.67                            | 34.71         | 54.33          | 38                          | 18.46                            | 20.64        | 14.57        | 28.45        |
|        | 2010             | 206,414          | 88           | 42.63                       | 46.02                            | 36.88         | 56.83          | 52                          | 25.19                            | 27.76        | 20.70        | 36.49        |
|        | 2011             | 206,88           | 83           | 40.12                       | 42.73                            | 34.01         | 53.07          | 48                          | 23.20                            | 24.98        | 18.40        | 33.18        |
|        | 2012             | 206,612          | 83           | 40.17                       | 41.90                            | 33.35         | 52.00          | 44                          | 21.30                            | 22.41        | 16.30        | 30.11        |
|        | 2013             | 205,474          | 114          | 55.48                       | 57.17                            | 47.17         | 68.68          | 72                          | 35.04                            | 36.19        | 28.34        | 45.62        |
|        | 2014             | 204,569          | 138          | 67.46                       | 68.27                            | 57.37         | 80.68          | 71                          | 34.71                            | 35.29        | 27.57        | 44.51        |
|        | 2015             | 204,119          | 137          | 67.12                       | 67.12                            | 56.34         | 79.33          | 71                          | 34.78                            | 34.78        | 27.18        | 43.88        |
|        | <b>1999-2015</b> | <b>3,314,018</b> | <b>1,704</b> | <b>51.42</b>                | <b>55.15</b>                     | <b>52.53</b>  | <b>57.85</b>   | <b>712</b>                  | <b>21.48</b>                     | <b>23.55</b> | <b>21.82</b> | <b>25.36</b> |
| TKA    | 1999             | 172,698          | 11           | 6.37                        | 6.46                             | 3.17          | 12.39          | 5                           | 2.90                             | 2.99         | 0.99         | 7.86         |
|        | 2000             | 174,765          | 9            | 5.15                        | 5.40                             | 2.44          | 11.00          | 7                           | 4.01                             | 4.27         | 1.73         | 9.54         |
|        | 2001             | 176,763          | 17           | 9.62                        | 10.09                            | 5.83          | 16.78          | 14                          | 7.92                             | 8.60         | 4.67         | 15.03        |
|        | 2002             | 180,809          | 18           | 9.96                        | 11.08                            | 6.55          | 18.01          | 13                          | 7.19                             | 7.69         | 4.08         | 13.67        |

|             |                  |                  |            |              |              |              |              |            |              |              |              |              |
|-------------|------------------|------------------|------------|--------------|--------------|--------------|--------------|------------|--------------|--------------|--------------|--------------|
|             | 2003             | 185,045          | 23         | 12.43        | 13.82        | 8.78         | 21.11        | 12         | 6.48         | 7.41         | 3.83         | 13.37        |
|             | 2004             | 188,735          | 20         | 10.60        | 11.62        | 7.10         | 18.32        | 17         | 9.01         | 9.99         | 5.78         | 16.39        |
|             | 2005             | 193,29           | 18         | 9.31         | 10.20        | 6.04         | 16.48        | 16         | 8.28         | 9.23         | 5.27         | 15.31        |
|             | 2006             | 196,662          | 34         | 17.29        | 19.47        | 13.45        | 27.45        | 25         | 12.71        | 14.08        | 9.08         | 21.04        |
|             | 2007             | 200,927          | 30         | 14.93        | 16.56        | 11.15        | 23.86        | 39         | 19.41        | 21.45        | 15.22        | 29.51        |
|             | 2008             | 204,415          | 42         | 20.55        | 22.85        | 16.47        | 31.08        | 32         | 15.65        | 17.33        | 11.83        | 24.63        |
|             | 2009             | 205,834          | 34         | 16.52        | 18.31        | 12.65        | 25.70        | 28         | 13.60        | 15.05        | 10.01        | 21.88        |
|             | 2010             | 206,414          | 35         | 16.96        | 18.05        | 12.56        | 25.25        | 30         | 14.53        | 16.03        | 10.79        | 22.97        |
|             | 2011             | 206,88           | 39         | 18.85        | 19.96        | 14.17        | 27.36        | 43         | 20.78        | 22.22        | 16.09        | 29.99        |
|             | 2012             | 206,612          | 45         | 21.78        | 22.95        | 16.74        | 30.79        | 41         | 19.84        | 20.83        | 14.92        | 28.32        |
|             | 2013             | 205,474          | 48         | 23.36        | 24.04        | 17.71        | 31.92        | 62         | 30.17        | 31.19        | 23.89        | 40.01        |
|             | 2014             | 204,569          | 55         | 26.89        | 27.29        | 20.54        | 35.51        | 48         | 23.46        | 23.86        | 17.58        | 31.63        |
|             | 2015             | 204,119          | 84         | 41.15        | 41.15        | 32.80        | 50.93        | 48         | 23.52        | 23.52        | 17.33        | 31.17        |
|             | <b>1999-2015</b> | <b>3,314,018</b> | <b>562</b> | <b>16.96</b> | <b>18.24</b> | <b>16.78</b> | <b>19.81</b> | <b>480</b> | <b>14.48</b> | <b>15.70</b> | <b>14.34</b> | <b>17.16</b> |
| ULA         | 1999             | 172,698          | 3          | 1.74         | 1.87         | 0.35         | 6.44         | 1          | 0.58         | 0.72         | 0.00         | 4.81         |
|             | 2000             | 174,765          | 4          | 2.29         | 2.43         | 0.66         | 7.16         | 10         | 5.72         | 5.95         | 2.79         | 11.75        |
|             | 2001             | 176,763          | 6          | 3.39         | 3.67         | 1.31         | 8.72         | 8          | 4.53         | 5.04         | 2.13         | 10.56        |
|             | 2002             | 180,809          | 3          | 1.66         | 1.52         | 0.28         | 5.49         | 9          | 4.98         | 5.03         | 2.26         | 10.24        |
|             | 2003             | 185,045          | 7          | 3.78         | 4.37         | 1.78         | 9.43         | 8          | 4.32         | 4.56         | 1.92         | 9.59         |
|             | 2004             | 188,735          | 7          | 3.71         | 3.84         | 1.50         | 8.47         | 12         | 6.36         | 6.95         | 3.59         | 12.57        |
|             | 2005             | 193,29           | 9          | 4.66         | 4.99         | 2.25         | 9.95         | 15         | 7.76         | 8.81         | 4.90         | 14.86        |
|             | 2006             | 196,662          | 7          | 3.56         | 3.31         | 1.29         | 7.40         | 18         | 9.15         | 10.20        | 6.04         | 16.41        |
|             | 2007             | 200,927          | 6          | 2.99         | 3.38         | 1.22         | 7.61         | 7          | 3.48         | 3.42         | 1.33         | 7.47         |
|             | 2008             | 204,415          | 5          | 2.45         | 2.41         | 0.75         | 6.02         | 15         | 7.34         | 7.40         | 4.09         | 12.50        |
|             | 2009             | 205,834          | 6          | 2.91         | 2.92         | 1.05         | 6.70         | 11         | 5.34         | 5.72         | 2.87         | 10.45        |
|             | 2010             | 206,414          | 14         | 6.78         | 7.24         | 3.96         | 12.28        | 21         | 10.17        | 10.93        | 6.78         | 16.82        |
|             | 2011             | 206,88           | 18         | 8.70         | 9.16         | 5.44         | 14.60        | 19         | 9.18         | 9.61         | 5.77         | 15.11        |
|             | 2012             | 206,612          | 8          | 3.87         | 3.93         | 1.67         | 7.88         | 24         | 11.62        | 11.99        | 7.65         | 17.91        |
|             | 2013             | 205,474          | 14         | 6.81         | 6.94         | 3.80         | 11.68        | 30         | 14.60        | 14.92        | 10.04        | 21.35        |
| 2014        | 204,569          | 19               | 9.29       | 9.39         | 5.64         | 14.70        | 18           | 8.80       | 8.87         | 5.27         | 14.06        |              |
| 2015        | 204,119          | 23               | 11.27      | 11.27        | 7.12         | 16.90        | 31           | 15.19      | 15.19        | 10.30        | 21.56        |              |
|             | <b>1999-2015</b> | <b>3,314,018</b> | <b>159</b> | <b>4.80</b>  | <b>5.07</b>  | <b>4.29</b>  | <b>5.95</b>  | <b>257</b> | <b>7.75</b>  | <b>8.19</b>  | <b>7.22</b>  | <b>9.25</b>  |
| Arthrodesis | 1999             | 172,698          | 3          | 1.74         | 1.87         | 0.35         | 6.44         |            | 0.00         | 0.00         | -            | -            |
|             | 2000             | 174,765          | 5          | 2.86         | 3.13         | 0.98         | 8.12         |            | 0.00         | 0.00         | -            | -            |
|             | 2001             | 176,763          | 7          | 3.96         | 4.16         | 1.68         | 9.30         | 2          | 1.13         | 1.18         | 0.15         | 5.22         |
|             | 2002             | 180,809          | 4          | 2.21         | 2.50         | 0.69         | 7.02         |            | 0.00         | 0.00         | -            | -            |
|             | 2003             | 185,045          | 4          | 2.16         | 2.57         | 0.71         | 7.04         | 3          | 1.62         | 1.48         | 0.27         | 5.27         |
|             | 2004             | 188,735          | 5          | 2.65         | 2.96         | 0.98         | 7.38         | 2          | 1.06         | 1.25         | 0.15         | 4.96         |
|             | 2005             | 193,29           | 3          | 1.55         | 1.42         | 0.27         | 4.91         | 2          | 1.03         | 1.01         | 0.10         | 4.41         |
|             | 2006             | 196,662          | 5          | 2.54         | 2.72         | 0.85         | 6.74         | 2          | 1.02         | 0.81         | 0.10         | 3.84         |
|             | 2007             | 200,927          | 1          | 0.50         | 0.57         | 0.00         | 3.55         | 3          | 1.49         | 1.70         | 0.33         | 5.29         |
|             | 2008             | 204,415          | 5          | 2.45         | 2.74         | 0.91         | 6.62         | 2          | 0.98         | 1.07         | 0.15         | 4.21         |
|             | 2009             | 205,834          | 6          | 2.91         | 3.20         | 1.15         | 7.13         | 1          | 0.49         | 0.54         | 0.00         | 3.26         |
| 2010        | 206,414          | 6                | 2.91       | 2.91         | 1.05         | 6.60         | 5            | 2.42       | 2.41         | 0.80         | 5.90         |              |
| 2011        | 206,88           | 9                | 4.35       | 4.65         | 2.10         | 8.92         | 3            | 1.45       | 1.36         | 0.27         | 4.27         |              |

|                   |                  |                  |            |              |              |              |              |            |              |              |              |              |
|-------------------|------------------|------------------|------------|--------------|--------------|--------------|--------------|------------|--------------|--------------|--------------|--------------|
|                   | 2012             | 206,612          | 3          | 1.45         | 1.53         | 0.29         | 4.54         | 6          | 2.90         | 2.98         | 1.08         | 6.61         |
|                   | 2013             | 205,474          | 7          | 3.41         | 3.48         | 1.37         | 7.21         | 4          | 1.95         | 1.96         | 0.52         | 5.11         |
|                   | 2014             | 204,569          | 4          | 1.96         | 1.96         | 0.52         | 5.06         | 5          | 2.44         | 2.46         | 0.82         | 5.76         |
|                   | 2015             | 204,119          | 5          | 2.45         | 2.45         | 0.81         | 5.69         | 4          | 1.96         | 1.96         | 0.52         | 5.00         |
|                   | <b>1999-2015</b> | <b>3,314,018</b> | <b>82</b>  | <b>2.47</b>  | <b>2.65</b>  | <b>2.12</b>  | <b>3.29</b>  | <b>44</b>  | <b>1.33</b>  | <b>1.37</b>  | <b>0.99</b>  | <b>1.83</b>  |
| Spinal<br>Surgery | 1999             | 172,698          | 25         | 14.48        | 15.79        | 10.12        | 24.07        | 7          | 4.05         | 4.46         | 1.78         | 10.03        |
|                   | 2000             | 174,765          | 32         | 18.31        | 18.93        | 12.83        | 27.44        | 9          | 5.15         | 5.72         | 2.58         | 11.57        |
|                   | 2001             | 176,763          | 33         | 18.67        | 20.48        | 14.04        | 29.33        | 10         | 5.66         | 6.56         | 3.15         | 12.60        |
|                   | 2002             | 180,809          | 35         | 19.36        | 21.26        | 14.70        | 30.10        | 10         | 5.53         | 6.00         | 2.85         | 11.63        |
|                   | 2003             | 185,045          | 36         | 19.45        | 20.99        | 14.65        | 29.48        | 17         | 9.19         | 10.17        | 5.85         | 16.80        |
|                   | 2004             | 188,735          | 40         | 21.19        | 24.75        | 17.67        | 33.99        | 16         | 8.48         | 8.51         | 4.81         | 14.37        |
|                   | 2005             | 193,29           | 44         | 22.76        | 24.52        | 17.79        | 33.29        | 19         | 9.83         | 10.51        | 6.28         | 16.81        |
|                   | 2006             | 196,662          | 48         | 24.41        | 27.02        | 19.92        | 36.11        | 20         | 10.17        | 10.46        | 6.36         | 16.56        |
|                   | 2007             | 200,927          | 53         | 26.38        | 28.77        | 21.50        | 37.90        | 17         | 8.46         | 9.05         | 5.23         | 14.77        |
|                   | 2008             | 204,415          | 57         | 27.88        | 30.81        | 23.31        | 40.15        | 24         | 11.74        | 12.60        | 8.03         | 19.00        |
|                   | 2009             | 205,834          | 58         | 28.18        | 30.33        | 22.98        | 39.38        | 24         | 11.66        | 12.74        | 8.14         | 19.13        |
|                   | 2010             | 206,414          | 68         | 32.94        | 34.68        | 26.92        | 44.13        | 26         | 12.60        | 13.12        | 8.54         | 19.39        |
|                   | 2011             | 206,88           | 70         | 33.84        | 35.72        | 27.84        | 45.24        | 31         | 14.98        | 15.73        | 10.67        | 22.42        |
|                   | 2012             | 206,612          | 73         | 35.33        | 37.18        | 29.13        | 46.82        | 33         | 15.97        | 16.36        | 11.25        | 23.04        |
|                   | 2013             | 205,474          | 78         | 37.96        | 39.13        | 30.95        | 48.88        | 32         | 15.57        | 16.04        | 10.96        | 22.69        |
| 2014              | 204,569          | 80               | 39.11      | 39.68        | 31.47        | 49.40        | 41           | 20.04      | 20.28        | 14.53        | 27.50        |              |
| 2015              | 204,119          | 110              | 53.89      | 53.89        | 44.30        | 64.94        | 39           | 19.11      | 19.11        | 13.57        | 26.11        |              |
|                   | <b>1999-2015</b> | <b>3,314,018</b> | <b>940</b> | <b>28.36</b> | <b>30.59</b> | <b>28.66</b> | <b>32.60</b> | <b>375</b> | <b>11.32</b> | <b>12.00</b> | <b>10.83</b> | <b>13.28</b> |

OS: orthopedic surgery; SpA: spondyloarthritis; THA: total hip arthroplasty; TKA: total knee arthroplasty; ULA: upper limb arthroplasty; \*\*adjusted by age and sex.

SM-Table 3: Crude and Adjusted Incidence by Type of OS for Women.

| All    | Year             | Population*      | SpA Cohort  |                             |                                  |               |               | Non-SpA Cohort |                             |                                  |               |               |
|--------|------------------|------------------|-------------|-----------------------------|----------------------------------|---------------|---------------|----------------|-----------------------------|----------------------------------|---------------|---------------|
|        |                  |                  | Cases       | Crude rate (/100,000 /year) | Adjusted rate** (/100,000 /year) | 95% CI        |               | Cases          | Crude rate (/100,000 /year) | Adjusted rate** (/100,000 /year) | 95% CI        |               |
| All OS | 1999             | 88,345           | 64          | 72.44                       | 77.18                            | 59.27         | 99.38         | 36             | 40.75                       | 43.03                            | 29.99         | 60.42         |
|        | 2000             | 89,268           | 56          | 62.73                       | 63.69                            | 47.93         | 83.62         | 32             | 35.85                       | 38.51                            | 26.20         | 55.20         |
|        | 2001             | 90,154           | 66          | 73.21                       | 78.12                            | 60.30         | 100.09        | 47             | 52.13                       | 55.63                            | 40.81         | 74.68         |
|        | 2002             | 91,774           | 70          | 76.27                       | 79.70                            | 61.98         | 101.44        | 54             | 58.84                       | 65.04                            | 48.72         | 85.53         |
|        | 2003             | 93,561           | 75          | 80.16                       | 85.96                            | 67.54         | 108.28        | 66             | 70.54                       | 75.46                            | 58.29         | 96.57         |
|        | 2004             | 95,091           | 76          | 79.92                       | 84.82                            | 66.71         | 106.74        | 84             | 88.34                       | 94.95                            | 75.65         | 118.05        |
|        | 2005             | 96,791           | 80          | 82.65                       | 88.95                            | 70.44         | 111.21        | 69             | 71.29                       | 77.50                            | 60.23         | 98.55         |
|        | 2006             | 98,323           | 91          | 92.55                       | 97.30                            | 78.24         | 119.93        | 71             | 72.21                       | 77.38                            | 60.36         | 97.98         |
|        | 2007             | 100,146          | 99          | 98.86                       | 104.28                           | 84.71         | 127.31        | 80             | 79.88                       | 85.98                            | 68.15         | 107.32        |
|        | 2008             | 101,634          | 125         | 122.99                      | 130.25                           | 108.38        | 155.50        | 80             | 78.71                       | 85.03                            | 67.40         | 106.08        |
|        | 2009             | 102,511          | 121         | 118.04                      | 124.56                           | 103.33        | 149.06        | 118            | 115.11                      | 123.50                           | 102.19        | 148.13        |
|        | 2010             | 103,061          | 142         | 137.78                      | 144.11                           | 121.34        | 170.03        | 118            | 114.49                      | 121.12                           | 100.24        | 145.20        |
|        | 2011             | 103,546          | 144         | 139.07                      | 144.58                           | 121.89        | 170.33        | 134            | 129.41                      | 135.80                           | 113.77        | 160.95        |
|        | 2012             | 103,773          | 155         | 149.36                      | 154.35                           | 130.98        | 180.71        | 145            | 139.73                      | 145.30                           | 122.61        | 171.06        |
|        | 2013             | 103,609          | 194         | 187.24                      | 191.36                           | 165.35        | 220.31        | 157            | 151.53                      | 155.63                           | 132.22        | 181.99        |
|        | 2014             | 103,442          | 169         | 163.38                      | 165.05                           | 141.11        | 191.90        | 206            | 199.14                      | 201.51                           | 174.94        | 231.02        |
|        | 2015             | 103,411          | 224         | 216.61                      | 216.62                           | 189.20        | 246.92        | 172            | 166.33                      | 166.33                           | 142.40        | 193.13        |
|        | <b>1999-2015</b> | <b>1,668,447</b> | <b>1951</b> | <b>116.94</b>               | <b>122.57</b>                    | <b>117.16</b> | <b>128.15</b> | <b>1,669</b>   | <b>100.03</b>               | <b>106.00</b>                    | <b>100.95</b> | <b>111.22</b> |
| THA    | 1999             | 88,345           | 25          | 28.30                       | 32.37                            | 20.87         | 48.46         | 16             | 18.11                       | 19.95                            | 11.30         | 33.23         |
|        | 2000             | 89,268           | 20          | 22.40                       | 22.41                            | 13.54         | 35.63         | 12             | 13.44                       | 15.44                            | 7.84          | 27.80         |
|        | 2001             | 90,154           | 21          | 23.29                       | 25.67                            | 15.82         | 39.93         | 12             | 13.31                       | 13.91                            | 7.14          | 25.20         |
|        | 2002             | 91,774           | 22          | 23.97                       | 24.79                            | 15.43         | 38.40         | 27             | 29.42                       | 33.60                            | 22.04         | 49.52         |
|        | 2003             | 93,561           | 25          | 26.72                       | 27.69                            | 17.82         | 41.60         | 27             | 28.86                       | 31.51                            | 20.68         | 46.44         |
|        | 2004             | 95,091           | 31          | 32.60                       | 34.19                            | 23.15         | 49.15         | 29             | 30.50                       | 33.34                            | 22.27         | 48.38         |
|        | 2005             | 96,791           | 21          | 21.70                       | 24.29                            | 14.96         | 37.61         | 24             | 24.80                       | 27.36                            | 17.44         | 41.18         |
|        | 2006             | 98,323           | 25          | 25.43                       | 26.91                            | 17.37         | 40.18         | 27             | 27.46                       | 30.00                            | 19.70         | 44.02         |
|        | 2007             | 100,146          | 32          | 31.95                       | 34.04                            | 23.24         | 48.44         | 22             | 21.97                       | 24.52                            | 15.30         | 37.40         |
|        | 2008             | 101,634          | 28          | 27.55                       | 28.58                            | 18.95         | 41.65         | 19             | 18.69                       | 21.22                            | 12.73         | 33.37         |
|        | 2009             | 102,511          | 29          | 28.29                       | 30.14                            | 20.14         | 43.55         | 36             | 35.12                       | 38.53                            | 26.94         | 53.52         |
|        | 2010             | 103,061          | 35          | 33.96                       | 35.86                            | 24.94         | 50.08         | 37             | 35.90                       | 38.63                            | 27.21         | 53.36         |
|        | 2011             | 103,546          | 36          | 34.77                       | 37.10                            | 25.96         | 51.45         | 36             | 34.77                       | 37.00                            | 25.88         | 51.29         |
|        | 2012             | 103,773          | 42          | 40.47                       | 41.76                            | 30.08         | 56.55         | 32             | 30.84                       | 32.48                            | 22.23         | 45.90         |
|        | 2013             | 103,609          | 50          | 48.26                       | 49.49                            | 36.76         | 65.31         | 41             | 39.57                       | 40.88                            | 29.33         | 55.50         |
|        | 2014             | 103,442          | 46          | 44.47                       | 44.95                            | 32.92         | 59.98         | 58             | 56.07                       | 56.84                            | 43.14         | 73.49         |
|        | 2015             | 103,411          | 69          | 66.72                       | 66.73                            | 51.94         | 84.44         | 53             | 51.25                       | 51.25                            | 38.42         | 67.04         |
|        | <b>1999-2015</b> | <b>1,668,447</b> | <b>557</b>  | <b>33.38</b>                | <b>35.31</b>                     | <b>32.43</b>  | <b>38.37</b>  | <b>508</b>     | <b>30.45</b>                | <b>33.04</b>                     | <b>30.21</b>  | <b>36.08</b>  |
| TKA    | 1999             | 88,345           | 13          | 14.72                       | 14.97                            | 7.93          | 26.53         | 13             | 14.72                       | 14.97                            | 7.93          | 26.53         |
|        | 2000             | 89,268           | 13          | 14.56                       | 14.39                            | 7.63          | 25.62         | 16             | 17.92                       | 17.69                            | 10.09         | 29.61         |
|        | 2001             | 90,154           | 16          | 17.75                       | 18.23                            | 10.37         | 30.42         | 20             | 22.18                       | 22.85                            | 13.95         | 36.05         |
|        | 2002             | 91,774           | 18          | 19.61                       | 20.92                            | 12.38         | 33.74         | 19             | 20.70                       | 22.13                            | 13.24         | 35.29         |

|             |                  |                  |            |              |              |              |              |            |                 |                |                |               |
|-------------|------------------|------------------|------------|--------------|--------------|--------------|--------------|------------|-----------------|----------------|----------------|---------------|
|             | 2003             | 93,561           | 20         | 21.38        | 22.12        | 13.50        | 34.78        | 30         | 32.06           | 33.49          | 22.56          | 48.41         |
|             | 2004             | 95,091           | 16         | 16.83        | 18.39        | 10.46        | 30.39        | 38         | 39.96           | 42.12          | 29.78          | 58.32         |
|             | 2005             | 96,791           | 19         | 19.63        | 20.96        | 12.58        | 33.23        | 28         | 28.93           | 30.62          | 20.31          | 44.72         |
|             | 2006             | 98,323           | 24         | 24.41        | 26.32        | 16.84        | 39.53        | 35         | 35.60           | 37.87          | 26.33          | 53.05         |
|             | 2007             | 100,146          | 29         | 28.96        | 30.73        | 20.57        | 44.47        | 44         | 43.94           | 46.62          | 33.84          | 62.90         |
|             | 2008             | 101,634          | 41         | 40.34        | 42.79        | 30.69        | 58.33        | 35         | 34.44           | 36.56          | 25.44          | 51.13         |
|             | 2009             | 102,511          | 31         | 30.24        | 31.61        | 21.48        | 45.11        | 56         | 54.63           | 58.18          | 43.94          | 75.74         |
|             | 2010             | 103,061          | 46         | 44.63        | 46.60        | 34.12        | 62.34        | 47         | 45.60           | 47.69          | 35.04          | 63.60         |
|             | 2011             | 103,546          | 44         | 42.49        | 43.71        | 31.73        | 58.83        | 55         | 53.12           | 55.37          | 41.70          | 72.17         |
|             | 2012             | 103,773          | 50         | 48.18        | 49.78        | 36.97        | 65.72        | 67         | 64.56           | 66.92          | 51.84          | 85.03         |
|             | 2013             | 103,609          | 56         | 54.05        | 55.29        | 41.78        | 71.81        | 66         | 63.70           | 65.33          | 50.55          | 83.13         |
|             | 2014             | 103,442          | 51         | 49.30        | 49.95        | 37.18        | 65.70        | 88         | 85.07           | 86.04          | 68.98          | 106.04        |
|             | 2015             | 103,411          | 66         | 63.82        | 63.82        | 49.38        | 81.21        | 72         | 69.63           | 69.63          | 54.46          | 87.69         |
|             | <b>1999-2015</b> | <b>1,668,447</b> | <b>553</b> | <b>33.14</b> | <b>34.54</b> | <b>31.72</b> | <b>37.55</b> | <b>729</b> | <b>43.69</b>    | <b>45.52</b>   | <b>42.28</b>   | <b>48.98</b>  |
| ULA         | 1999             | 88,345           | 6          | 6.79         | 6.96         | 2.51         | 16.26        | 5          | 5.659622        | 5.8534         | 1.8433         | 14.7791       |
|             | 2000             | 89,268           | 5          | 5.60         | 6.02         | 1.90         | 15.02        | 2          | 2.24042         | 2.6905         | 0.3053         | 10.492        |
|             | 2001             | 90,154           | 5          | 5.55         | 5.93         | 1.91         | 14.74        | 4          | 4.436817        | 4.8306         | 1.3292         | 13.2571       |
|             | 2002             | 91,774           | 3          | 3.27         | 3.23         | 0.64         | 10.66        | 5          | 5.448125        | 5.8408         | 1.8846         | 14.4989       |
|             | 2003             | 93,561           | 7          | 7.48         | 8.53         | 3.42         | 18.10        | 7          | 7.48173         | 8.1364         | 3.2422         | 17.4709       |
|             | 2004             | 95,091           | 7          | 7.36         | 8.09         | 3.23         | 17.26        | 10         | 10.51616        | 11.4128        | 5.4413         | 21.52         |
|             | 2005             | 96,791           | 7          | 7.23         | 7.99         | 3.18         | 17.00        | 9          | 9.298314        | 10.121         | 4.6292         | 19.7038       |
|             | 2006             | 98,323           | 10         | 10.17        | 9.91         | 4.74         | 18.87        | 3          | 3.051164        | 3.3396         | 0.6785         | 10.2555       |
|             | 2007             | 100,146          | 8          | 7.99         | 8.17         | 3.53         | 16.58        | 9          | 8.986863        | 9.6436         | 4.4099         | 18.6876       |
|             | 2008             | 101,634          | 10         | 9.84         | 10.35        | 4.93         | 19.40        | 14         | 13.77486        | 14.904         | 8.1603         | 25.2847       |
|             | 2009             | 102,511          | 17         | 16.58        | 17.57        | 10.23        | 28.38        | 12         | 11.7061         | 12.3197        | 6.3459         | 21.7957       |
|             | 2010             | 103,061          | 8          | 7.76         | 7.84         | 3.38         | 15.74        | 18         | 17.46524        | 18.4242        | 10.9414        | 29.2665       |
|             | 2011             | 103,546          | 14         | 13.52        | 14.01        | 7.67         | 23.64        | 23         | 22.21234        | 23.3837        | 14.8199        | 35.2005       |
|             | 2012             | 103,773          | 19         | 18.31        | 19.02        | 11.44        | 29.78        | 24         | 23.12736        | 24.0581        | 15.4219        | 35.8939       |
|             | 2013             | 103,609          | 28         | 27.02        | 27.63        | 18.35        | 39.96        | 25         | 24.12895        | 24.7661        | 16.0444        | 36.5921       |
| 2014        | 103,442          | 16               | 15.47      | 15.59        | 8.89         | 25.35        | 35           | 33.83512   | 34.2775         | 23.861         | 47.6742        |               |
| 2015        | 103,411          | 16               | 15.47      | 15.47        | 8.83         | 25.11        | 20           | 19.3404    | 19.3407         | 11.8326        | 29.8661        |               |
|             | <b>1999-2015</b> | <b>1,668,447</b> | <b>186</b> | <b>11.15</b> | <b>11.68</b> | <b>10.05</b> | <b>13.49</b> | <b>225</b> | <b>13.48559</b> | <b>14.3595</b> | <b>12.5503</b> | <b>16.395</b> |
| Arthrodesis | 1999             | 88,345           | 5          | 5.66         | 5.62         | 1.79         | 14.41        |            | 0.00            | 0.00           | -              | -             |
|             | 2000             | 89,268           | 2          | 2.24         | 2.69         | 0.31         | 10.49        |            | 0.00            | 0.00           | -              | -             |
|             | 2001             | 90,154           | 6          | 6.66         | 6.58         | 2.36         | 15.47        | 2          | 2.22            | 2.42           | 0.26           | 9.75          |
|             | 2002             | 91,774           | 5          | 5.45         | 5.79         | 1.86         | 14.43        |            | 0.00            | 0.00           | -              | -             |
|             | 2003             | 93,561           | 4          | 4.28         | 4.81         | 1.33         | 12.98        | 1          | 1.07            | 1.09           | 0.05           | 7.29          |
|             | 2004             | 95,091           | 2          | 2.10         | 2.28         | 0.28         | 9.02         | 2          | 2.10            | 2.42           | 0.27           | 9.30          |
|             | 2005             | 96,791           | 7          | 7.23         | 7.09         | 2.81         | 15.43        | 1          | 1.03            | 1.17           | 0.05           | 7.15          |
|             | 2006             | 98,323           | 10         | 10.17        | 11.25        | 5.36         | 21.06        |            | 0.00            | 0.00           | -              | -             |
|             | 2007             | 100,146          | 5          | 4.99         | 4.91         | 1.57         | 12.14        | 1          | 1.00            | 1.04           | 0.05           | 6.48          |
|             | 2008             | 101,634          | 6          | 5.90         | 6.01         | 2.18         | 13.56        | 3          | 2.95            | 2.93           | 0.58           | 9.15          |
|             | 2009             | 102,511          | 4          | 3.90         | 3.92         | 1.04         | 10.47        | 1          | 0.98            | 0.83           | 0.00           | 5.65          |
| 2010        | 103,061          | 5                | 4.85       | 5.23         | 1.68         | 12.36        | 2            | 1.94       | 2.05            | 0.26           | 7.66           |               |
| 2011        | 103,546          | 3                | 2.90       | 2.88         | 0.58         | 8.74         | 3            | 2.90       | 3.00            | 0.61           | 8.96           |               |

|                   |                  |                  |            |              |              |              |              |            |              |              |              |              |
|-------------------|------------------|------------------|------------|--------------|--------------|--------------|--------------|------------|--------------|--------------|--------------|--------------|
|                   | 2012             | 103,773          | 4          | 3.85         | 4.06         | 1.08         | 10.46        | 7          | 6.75         | 7.07         | 2.85         | 14.63        |
|                   | 2013             | 103,609          | 9          | 8.69         | 8.77         | 4.00         | 16.71        | 1          | 0.97         | 0.99         | 0.05         | 5.55         |
|                   | 2014             | 103,442          | 5          | 4.83         | 4.90         | 1.57         | 11.46        | 3          | 2.90         | 2.94         | 0.59         | 8.62         |
|                   | 2015             | 103,411          | 8          | 7.74         | 7.74         | 3.35         | 15.24        | 4          | 3.87         | 3.87         | 1.03         | 9.89         |
|                   | <b>1999-2015</b> | <b>1,668,447</b> | <b>90</b>  | <b>5.39</b>  | <b>5.57</b>  | <b>4.49</b>  | <b>6.89</b>  | <b>31</b>  | <b>1.86</b>  | <b>1.97</b>  | <b>1.33</b>  | <b>2.81</b>  |
| Spinal<br>Surgery | 1999             | 88,345           | 15         | 16.98        | 17.26        | 9.60         | 29.43        | 2          | 2.26         | 2.26         | 0.27         | 9.66         |
|                   | 2000             | 89,268           | 18         | 20.16        | 20.87        | 12.29        | 33.87        | 2          | 2.24         | 2.69         | 0.31         | 10.49        |
|                   | 2001             | 90,154           | 22         | 24.40        | 26.55        | 16.56        | 40.92        | 9          | 9.98         | 11.63        | 5.33         | 22.65        |
|                   | 2002             | 91,774           | 22         | 23.97        | 24.97        | 15.60        | 38.59        | 3          | 3.27         | 3.47         | 0.70         | 11.13        |
|                   | 2003             | 93,561           | 21         | 22.45        | 24.52        | 15.15        | 38.02        | 1          | 1.07         | 1.24         | 0.05         | 7.66         |
|                   | 2004             | 95,091           | 20         | 21.03        | 21.86        | 13.33        | 34.36        | 7          | 7.36         | 7.82         | 3.12         | 16.77        |
|                   | 2005             | 96,791           | 26         | 26.86        | 28.62        | 18.69        | 42.43        | 7          | 7.23         | 8.22         | 3.30         | 17.35        |
|                   | 2006             | 98,323           | 22         | 22.38        | 22.92        | 14.31        | 35.24        | 6          | 6.10         | 6.17         | 2.24         | 14.05        |
|                   | 2007             | 100,146          | 25         | 24.96        | 26.43        | 17.10        | 39.38        | 4          | 3.99         | 4.16         | 1.09         | 11.21        |
|                   | 2008             | 101,634          | 42         | 41.32        | 44.56        | 32.08        | 60.49        | 11         | 10.82        | 11.58        | 5.77         | 21.05        |
|                   | 2009             | 102,511          | 44         | 42.92        | 45.49        | 33.02        | 61.30        | 13         | 12.68        | 13.65        | 7.24         | 23.55        |
|                   | 2010             | 103,061          | 48         | 46.57        | 48.58        | 35.80        | 64.62        | 14         | 13.58        | 14.32        | 7.84         | 24.23        |
|                   | 2011             | 103,546          | 47         | 45.39        | 46.89        | 34.44        | 62.50        | 19         | 18.35        | 19.06        | 11.45        | 29.89        |
|                   | 2012             | 103,773          | 40         | 38.55        | 39.73        | 28.38        | 54.19        | 19         | 18.31        | 18.78        | 11.28        | 29.43        |
|                   | 2013             | 103,609          | 53         | 51.15        | 52.17        | 39.10        | 68.29        | 24         | 23.16        | 23.67        | 15.17        | 35.27        |
|                   | 2014             | 103,442          | 53         | 51.24        | 51.63        | 38.70        | 67.57        | 22         | 21.27        | 21.41        | 13.40        | 32.42        |
|                   | 2015             | 103,411          | 67         | 64.79        | 64.79        | 50.19        | 82.30        | 23         | 22.24        | 22.24        | 14.10        | 33.36        |
|                   | <b>1999-2015</b> | <b>1,668,447</b> | <b>585</b> | <b>35.06</b> | <b>36.72</b> | <b>33.80</b> | <b>39.84</b> | <b>186</b> | <b>11.15</b> | <b>11.73</b> | <b>10.10</b> | <b>13.54</b> |

OS: orthopedic surgery; SpA: spondyloarthritis; THA: total hip arthroplasty; TKA: total knee arthroplasty; ULA: upper limb arthroplasty; \*\*adjusted by age and sex.
